1 **Human Bone Marrow Assessment by Single Cell RNA Sequencing, Mass**  
2 **Cytometry and Flow Cytometry**

3  
4 **Short Title: Single Cell Analyses of Human Bone Marrow**  
5

6 Karolyn A. Oetjen<sup>1</sup>, Katherine E. Lindblad<sup>1</sup>, Meghali Goswami<sup>1</sup>, Gege Gui<sup>1</sup>, Pradeep K.  
7 Dagur<sup>2</sup>, Catherine Lai<sup>1</sup>, Laura W. Dillon<sup>1</sup>, J. Philip McCoy<sup>2</sup>, Christopher S. Hourigan<sup>1\*</sup>  
8

9 <sup>1</sup>Laboratory of Myeloid Malignancies and <sup>2</sup>Flow Cytometry Core, National Heart Lung  
10 and Blood Institute, 10 Center Drive, Bethesda, Maryland, USA  
11

12 \* To whom correspondence should be addressed:

13 Christopher S. Hourigan  
14 Laboratory of Myeloid Malignancies  
15 Hematology Branch  
16 National Heart, Lung and Blood Institute  
17 Room 10CRC 5-5130, 10 Center Drive  
18 Bethesda, Maryland, 20814-1476, USA  
19 [hourigan@nih.gov](mailto:hourigan@nih.gov)  
20

21  
22 Abstract: 150 words  
23 Text: 2469 words  
24 References: 39  
25 Figures: 3  
26 Tables: 1

27        **Abstract**

28

29            New techniques for single-cell analysis have led to insights into hematopoiesis  
30 and the immune system, but the ability of these techniques to cross-validate and  
31 reproducibly identify the biological variation in diverse human samples is currently  
32 unproven. We therefore performed a comprehensive assessment of human bone  
33 marrow cells using both single-cell RNA sequencing and multiparameter flow cytometry  
34 from twenty healthy adult human donors across a broad age range. These data  
35 characterize variation between healthy donors as well as age-associated changes in cell  
36 population frequencies. Direct comparison of techniques revealed discrepancy in the  
37 quantification of T lymphocyte and natural killer cell populations. Orthogonal validation of  
38 immunophenotyping using mass cytometry demonstrated good correlation with flow  
39 cytometry. Technical replicates using single-cell RNA sequencing matched robustly,  
40 while biological replicates showed variation. Given the increasing use of single-cell  
41 technologies in translational research, this resource serves as an important reference  
42 dataset and highlights opportunities for further refinement.

43

44        **Key Words**

45 hematopoiesis, bone marrow, high-dimensional, single-cell transcriptomics, mass  
46 cytometry, CyTOF, bone marrow, reproducibility

## 47 **Introduction**

48           New technologies for characterizing cell populations are being implemented to  
49 more deeply describe the cell surface receptor phenotype and gene transcriptional  
50 signature at the single cell level (1, 2). Benefits of single cell approaches include  
51 examination of heterogeneity within the sample, and the most recent advances permit  
52 use of samples with very limited cell numbers for high dimensional characterization of  
53 cell surface phenotype or transcriptome. Single cell RNA sequencing (scRNAseq) has  
54 been used to elucidate hematopoietic differentiation (3-5) and immune cell subsets (6)  
55 including dendritic cells and monocytes (7), and innate lymphoid cells (8). Mass  
56 cytometry has been applied to the study of tissue-infiltrating immune cells (e.g.  
57 melanoma (9), renal cell (10), lung (11), and breast (12) cancers).

58           Expanding these new single cell approaches to patient samples requires a clear  
59 understanding of their correlation with established techniques, including flow cytometry.  
60 In order to facilitate and validate analysis of large databases of scRNAseq we set out to  
61 provide a data set of human bone marrow analyzed by both scRNAseq and deep  
62 immunophenotyping. Our reference cohort includes a broad range of donor ages in  
63 recognition of age-related variation in the healthy population.

64

## 65 **Materials and Methods**

### 66 **Bone Marrow Aspirate Collection**

67 Healthy volunteers were recruited for bone marrow aspirate collection at the National  
68 Institutes of Health. This research was approved by the National Heart, Lung and Blood  
69 Institute Institutional Review Board, and all participants provided oral and written  
70 informed consent. Using standard operating procedures, mononuclear cells from bone  
71 marrow aspirates were isolated using Ficoll density gradient separation and

72 cryopreserved in 90% FBS/ 10% DMSO for storage in liquid nitrogen. Assays were  
73 performed as listed in Table 1 using matched cryopreserved vials from each donor.

#### 74 **Single cell RNA Sequencing**

75 scRNAseq was performed using 10X Genomics Single Cell 3' Solution, version 2  
76 according to manufacturer's instructions (protocol rev A). Libraries were sequenced on  
77 HiSeq3000 and analyzed using Cell Ranger V2.0.0 (10X Genomics). Quality control  
78 metrics were used to select cells with mitochondrial gene percentage less than 8% and  
79 at least 500 genes detected. Samples were analyzed using Seurat  
80 ([www.satijalab.org/seurat](http://www.satijalab.org/seurat)) using canonical correlation analysis with Louvain clustering,  
81 and visualized by t-distributed stochastic neighbor embedding (tSNE) (31).  
82 Developmental trajectories were created using Monocle versions 2 and 3 (32-34), the  
83 latter using Uniform Manifold Approximation and Projection for Dimension Reduction  
84 (UMAP) (35).

#### 85 **Flow cytometry**

86 BMDCs were thawed in RPMI-1640 (Gibco) with 10% FBS and resuspended in cell  
87 staining buffer. Benzoylase nuclease (Sigma Aldrich, catalog #E1014-25KU) was added  
88 for some samples during thawing to minimize cell clumping. Cells were blocked with  
89 Human TruStain FcX Fc receptor blocking solution (Biolegend, catalog #422302) and  
90 stained with antibodies listed in Table S1 followed by LIVE/DEAD Fixable Yellow stain  
91 (Life Technologies Corporation, Grand Island, NY) and fixation with 1% formaldehyde.  
92 Data were acquired with a Becton–Dickinson LSRFortessa (BD, San Jose, CA, USA)  
93 equipped with five lasers (355, 407, 488, 532 and 633 nm wavelengths) and 22 PMT  
94 detectors using DIVA 8 software using the high throughput sampler (BD) system at a  
95 flow rate of 2.5ul/sec in a 96 well U bottom tissue culture plate. Compensation controls  
96 were performed using single color staining of compensation beads (BD), and daily  
97 quality assurance was performed using Cytometer setup and Tracking beads (BD) as

98 per manufacturer's recommendation along with 1 peak rainbow Beads (BD) and 8 peak  
99 beads (Spherotec)(36, 37). Post-acquisition analysis was performed using Flowjo 9.9.6  
100 (Treestar Inc., San Carlos, CA, USA). Analysis excluded debris and doublets using light  
101 scatter measurements, and dead cells by live/dead stain. Gating strategies used to  
102 identify immune cell subsets are provided in Figure S2.

### 103 **Mass cytometry**

104 Thawed BMMCs were stained for 37 markers using the MaxPar Complete Human T Cell  
105 Immuno-Oncology Panel Set (Fluidigm), according to manufacturer instructions. Briefly,  
106 cells were thawed, washed, incubated with cisplatin cocktail for viability, fixed in 1.6%  
107 formaldehyde and permeabilized. Cells were then stained with the antibody cocktail,  
108 incubated with intercalation solution, mixed with EQ4 element beads and acquired with a  
109 Helios mass cytometer (Fluidigm). Gating and viSNE analysis (38) were performed using  
110 Cytobank (cytobank.org). Initial analysis excluded doublets using DNA content and non-  
111 viable cells using cisplatin. CD45-positive cells were gated for viSNE analysis of 100,000  
112 total events from all analyzed samples.

### 113 **Bulk RNA sequencing**

114 RNA was harvested from thawed cell vials of BMMCs using AllPrep kits (QIAGEN).  
115 Libraries were prepared using TruSeq Stranded Total RNA Sample Preparation Kit  
116 (Illumina) with 1ug of RNA input. Sequencing was performed by paired-end 75 nt on  
117 Illumina HiSeq 3000. Fastq files were mapped to using *kallisto*, and gene counts were  
118 tabulated using *tximport*. Deconvolution was performed using Xcell v1.1  
119 (xcell.ucsf.edu)(16) or Cibersort using LM22 gene signature and 100 permutations  
120 (cibersort.stanford.edu)(17).

### 121 **Data analysis and statistics**

122 Data were analysis, visualization and statistical comparisons were performed R (cran.r-  
123 project.org). Bland-Altman analysis (39) was implemented in the BlandAltmanLeh  
124 package v0.3.1.

### 125 **Data availability**

126 FCS files for flow cytometry and mass cytometry data sets have been deposited in  
127 FlowRepository (*accession#*). Single cell RNA sequencing and bulk RNA sequencing  
128 datasets have been deposited in Gene Expression Omnibus (GEO) (*accession#*).

129

## 130 **Results**

### 131 ***Healthy donor characteristics***

132 Twenty healthy volunteers were recruited for bone marrow aspiration procedures.  
133 The cohort consisted of 10 males and 10 females with ages ranging 24-84 years old and  
134 median age of 57 years. A second bone marrow aspiration was performed for two  
135 donors (Ck, Sk) (*“biological replicate”*) either 2 or 5 months after their first aspiration  
136 respectively. Cryopreserved cells from all twenty donors were analyzed by droplet-based  
137 scRNAseq and flow cytometry, and additional cryopreserved vials for eight donors were  
138 analyzed by mass cytometry for T cell phenotyping, as well as bulk RNA sequencing, as  
139 summarized in Table 1.

### 140 ***Single cell RNA sequencing***

141 Droplet-based scRNAseq of bone marrow mononuclear cells (BMMCs) for all donor  
142 samples was performed with goal minimum sequencing depth of 50,000 reads/cell and  
143 detected a mean of 880 genes/cells (range 575-1,390 gene/cell, Table 1). Greater than  
144 90,000 cells were captured; using quality filters of at least 500 genes per cell and less  
145 than 8% mitochondrial RNA content, 76,645 cells were analyzed in the final analysis.

146 To account for sample variations between donors, alignment of all samples was  
147 performed in Seurat using canonical correlation analysis (CCA) then visualized using t-

148 distributed stochastic neighbor embedding (t-SNE). Cell clusters were distinguished  
149 using the Louvain clustering algorithm implemented in Seurat. Compiled analysis of all  
150 donor cells is annotated in Figure 1A with the contribution of each individual donor  
151 displayed in Figure S1. All major previously identified populations of bone marrow  
152 mononuclear cells were present in the clustered scRNAseq analysis.

153 Single cell trajectory analysis was performed using Monocle 3. As there were  
154 potentially multiple disjoint trajectories in this complex dataset containing a large number  
155 of cells, UMAP was used for dimension reduction. The resulting development  
156 trajectories clearly display the major lymphoid, myeloid and erythroid lineages of  
157 hematopoiesis with correct ordering of developmental stages (Figure 1B). Trajectories  
158 of erythroid and myeloid lineages could also be created using an earlier, well validated,  
159 version of this software (Monocle2, see Figure S1) and were consistent with those  
160 observed for the full dataset.

161 Annotation of cell cluster identities was determined using a panel of canonical gene  
162 expression, with the expression patterns for a subset of these genes displayed in Figure  
163 1C. Analysis of each donor sample individually using principal component analysis  
164 (PCA) in Seurat revealed suboptimal quantification of frequencies of some  
165 transcriptionally similar cell subsets, including those annotated as effector T cells and  
166 NK cells. Such clusters were typically well delineated for each individual sample when  
167 using CCA in the context of the entire dataset (Figure S1).

168 A potential use of scRNAseq is to compare across two or more samples. To confirm  
169 the validity of scRNAseq for this approach, assay reproducibility was determined by  
170 preparing duplicate, side-by-side libraries from cells thawed from the same  
171 cryopreserved vial, for a total of three cryopreserved samples. Cell subtype  
172 quantification for each of these technical replicate pairs matched robustly (Figure 1D).  
173 The optimum number of cells required to identify, using scRNAseq, sub-populations

174 within a heterogenous samples remains an area of interest (13). Technical replicates  
175 ranged from 1,138 to 6,692 cells from the same sample (Table 1).

### 176 ***Flow cytometry***

177 13-color flow cytometry using five customized panels (“T, B, NK, Mono and DC”, see  
178 Table S1) designed to allow deep immunophenotyping of the predominant cell  
179 populations found in human bone marrow was performed on all samples. Approximately  
180 1 million cells were stained for each panel, and a median of 196,000 CD45 positive  
181 events collected (25<sup>th</sup>-75<sup>th</sup> percentile: 100,000-278,000 events). Gating strategy is  
182 shown in Table S2. Most frequent cell subtype populations observed were, in order, T  
183 cells, monocytes, B cells, natural killer cells (NK), dendritic cells (DC) and hematopoietic  
184 stem/progenitor cells (HSPC) (see Figure S2).

185 Paired analysis of the same sample by both transcriptome and cell surface  
186 phenotype offers a powerful opportunity to compare cell population frequencies  
187 determined by these methods. The proportion of major cell populations is summarized  
188 for scRNAseq and flow cytometry in Figure 2A. Sample-by-sample correlations for all of  
189 these populations are shown in Figure 2B. It is well established that the T memory cell  
190 population increases with increasing age in humans, likely due to response to viral  
191 infection (in particular CMV), and this trend was reproduced in our cohort using both  
192 scRNAseq and flow cytometry (Figure S2)(14). Two subjects had a second bone  
193 marrow aspiration performed at either 2 or 5 months after their first aspiration. These  
194 biological replicates showed good concordance by flow cytometry but showed variation  
195 by scRNAseq particularly in lower frequency cell subsets, likely from sampling error  
196 (Figure S2)

197 While concordance between these two modalities was generally good, it appeared  
198 that T cell frequency was elevated, and NK cell frequency decreased in scRNAseq as  
199 compared with flow cytometry. This led to a more detailed examination of T cells



200 subsets and orthogonal validation of cell surface immunophenotyping using a third single  
201 cell modality.

### 202 ***Mass cytometry***

203 In order to more deeply characterize immune populations within healthy bone  
204 marrow, and to validate our flow cytometry results, T cell phenotyping was performed by  
205 mass cytometry using a 37-marker panel for a subset of eight donors. Using Cytobank  
206 software, CD45-positive cells were visualized using viSNE across the panel of markers  
207 (Figures 3A and S3). Correlation between mass cytometry and flow cytometry for CD4-  
208 and CD8-positive T lymphocyte subsets was good as shown in Figure 3B.

209 To further compare mass cytometry and flow cytometry with scRNAseq of T cell  
210 populations, the frequencies of T cell subsets for this cohort of eight donors were  
211 determined using all three of these methods, shown in Figure 3C with sample  
212 correlations reported in Figure 3D. Comparing frequencies of T cell populations  
213 between mass cytometry and scRNAseq confirmed a small but persistent skewing in the  
214 identification of NK and T cells. Using Bland-Altman calculations, the mean difference  
215 between scRNAseq and mass cytometry for T cells was -6.5% (95% CI: -29% to 16%)  
216 and for NK cells was 3.2% (95% CI: -1.1% to 7.6%).

217 CD8 cytotoxic T cells and NK cells are known to have substantial overlap at the  
218 transcriptome level (15). To better understand systemic bias in the frequency of NK or T  
219 cells identified, we confirmed that overlapping gene signatures are found in clusters  
220 annotated as NK or T cells in this scRNAseq data set (Figure S4). The reasons for this  
221 bias are likely however multifactorial.

### 222 ***Bulk RNA-sequencing***

223 Analysis of bulk sample RNA expression has been used to attempt to  
224 deconvolute the proportion of each cell subtype in human tissues (16, 17). Finally, as an  
225 additional resource, stranded whole transcriptome sequencing of RNA isolated from

226 thawed BMMCs was performed on samples from all eight subjects for which mass and  
227 flow cytometry and single cell RNA sequencing was available. Initial analysis using  
228 deconvolution algorithms that attempt to predict the proportion of cell subpopulations is  
229 shown in Table S4.

230

## 231 **Discussion**

232 Changes in the immune system (14) and hematopoiesis (18) occur during human  
233 aging. Using an unbiased approach based on unsorted human BMMCs, we describe  
234 the major cell populations of healthy human bone marrow from a cohort of donors over a  
235 wide range of adult age by multiple high-dimensional single cell techniques. This  
236 resource serves as a complement to existing data sets that have consisted primarily of  
237 younger donors without associated paired immunophenotyping. Our data set provides a  
238 resource of scRNAseq, flow cytometry and mass cytometry data for healthy control  
239 cohorts across the full range of adulthood providing not only cell population frequencies  
240 and characteristics, but also highlighting individual variation in human cohorts.

241 Using scRNAseq of a total of over 76,000 cells from 20 healthy donors, all the  
242 major bone marrow mononuclear populations are identified, and overall population  
243 frequencies are comparable to flow cytometry of the matched samples. A primary  
244 limitation is distinguishing cell populations such as NK cells and CD8+ effector T cells,  
245 which have overlapping transcriptional programs with a small number of distinguishing  
246 genes captured by droplet-based scRNAseq. To overcome this limitation and provide  
247 additional reference data beyond previous reports of major healthy bone marrow  
248 populations by flow cytometry (19) and mass cytometry (20, 21), we used the strength of  
249 mass cytometry for high resolution of T cell subpopulations (22), both to validate our flow  
250 cytometry results and provide quantification of rare T cell subpopulations within healthy  
251 human bone marrow.

252 As a data resource, these high-dimensional approaches to bone marrow  
253 characterization add valuable information on transcriptional and cell surface marker co-  
254 expression. The growing number of bioinformatics tools for mass cytometry (23) and  
255 scRNAseq (24, 25) will benefit from reference data sets for validation and integrated  
256 comparison across techniques. Future opportunities for integrating these data sets  
257 include droplet-based sequencing with oligonucleotide-tagged antibodies, including  
258 CITE-Seq (26), REAP-Seq (27), and AbSeq (28), which can be compared to this  
259 reference set of cell surface protein and transcriptome expression. As techniques (29)  
260 and repositories (30) of high-dimensional single cell human data sets are expanded,  
261 validating the observed cell identities will be a critical aspect of interpreting large data set  
262 analysis.

263 Additional aliquots of bone marrow aspirate from this cohort together with paired  
264 blood samples, that were not yet analyzed, have been stored. Should transformative  
265 technologies emerge over the next few years we would be willing, subject to relevant  
266 technology transfer and clinical regulatory approvals, to share remaining samples with  
267 academic investigators for additional benchmarking and validation. In summary, this  
268 resource provides a reference dataset for cell populations in healthy human bone  
269 marrow across a wide age range as assessed by multiple single-cell approaches. We  
270 show that scRNAseq quantification of marrow-resident cell populations has good  
271 concordance with immunophenotyping by flow and mass cytometry with some  
272 discrepancies in T and NK subsets. We hope this unique combined dataset will prove  
273 useful both to those seeking to refine or innovate bioinformatic algorithms for scRNAseq  
274 data and also to those investigators hoping to apply these powerful single-cell  
275 technologies in their own research.

276

277 **Acknowledgments:** This work was supported by the Intramural Research Program of  
278 the National Heart, Lung, and Blood Institute of the National Institutes of Health. We  
279 appreciate the technical expertise of Brian Sellers and the NIH Center for Human  
280 Immunology, Yan Luo, Yuesheng Li and the NHLBI DNA Sequencing Core, Alan  
281 Hoofring of NIH Medical Arts and NIH High-Performance Computing. We thank Sheenu  
282 Sheela, Blair DeStefano, Janet Valdez and NHLBI research nurses for bone marrow  
283 aspirate procedures. The authors would like to thank Neal Young, Cindy Dunbar (both  
284 NIH) and Elizabeth Jaffee (Johns Hopkins) for reading and comments, and Efthymia  
285 Papalexi and Rahul Satija (both New York Genome Center, NY) for help with scRNAseq  
286 analysis and comments.  
287

288 **Authorship Contributions:** KO performed experiments, analyzed data and wrote the  
289 manuscript; KL and MG performed flow cytometry experiments and analyzed data; GG  
290 and LD analyzed data; PD and PM designed, supervised and analyzed flow cytometry  
291 experiments, CL coordinated donor recruitment; CH designed experiments, analyzed  
292 data and wrote the manuscript. All authors reviewed the final manuscript.  
293

294 **Declaration of Interests:** CSH receives research funding from Merck Sharpe & Dohme  
295 and SELLAS Life Sciences Group AG. The other authors declare no relevant competing  
296 financial interests.  
297

## 298 **References**

- 299  
300 1. Macosko EZ, Basu A, Satija R, Nemesh J, Shekhar K, Goldman M, et al. Highly  
301 Parallel Genome-wide Expression Profiling of Individual Cells Using Nanoliter Droplets.  
302 *Cell*. 2015;161(5):1202-14.
- 303 2. Zheng GX, Terry JM, Belgrader P, Ryvkin P, Bent ZW, Wilson R, et al. Massively  
304 parallel digital transcriptional profiling of single cells. *Nature communications*.  
305 2017;8:14049.
- 306 3. Buenrostro JD, Corces MR, Lareau CA, Wu B, Schep AN, Aryee MJ, et al.  
307 Integrated Single-Cell Analysis Maps the Continuous Regulatory Landscape of Human  
308 Hematopoietic Differentiation. *Cell*. 2018;173(6):1535-48.e16.
- 309 4. Psaila B, Barkas N, Iskander D, Roy A, Anderson S, Ashley N, et al. Single-cell  
310 profiling of human megakaryocyte-erythroid progenitors identifies distinct megakaryocyte  
311 and erythroid differentiation pathways. *Genome biology*. 2016;17:83.
- 312 5. Velten L, Haas SF, Raffel S, Blaszkiewicz S, Islam S, Hennig BP, et al. Human  
313 haematopoietic stem cell lineage commitment is a continuous process. *Nature cell  
314 biology*. 2017;19(4):271-81.
- 315 6. Papalexi E, Satija R. Single-cell RNA sequencing to explore immune cell  
316 heterogeneity. *Nature reviews Immunology*. 2018;18(1):35-45.
- 317 7. Villani AC, Satija R, Reynolds G, Sarkizova S, Shekhar K, Fletcher J, et al.  
318 Single-cell RNA-seq reveals new types of human blood dendritic cells, monocytes, and  
319 progenitors. *Science (New York, NY)*. 2017;356(6335).

- 320 8. Bjorklund AK, Forkel M, Picelli S, Konya V, Theorell J, Friberg D, et al. The  
321 heterogeneity of human CD127(+) innate lymphoid cells revealed by single-cell RNA  
322 sequencing. *Nature immunology*. 2016;17(4):451-60.
- 323 9. Nirschl CJ, Suarez-Farinas M, Izar B, Prakadan S, Dannenfeller R, Tirosh I, et  
324 al. IFN $\gamma$ -Dependent Tissue-Immune Homeostasis Is Co-opted in the Tumor  
325 Microenvironment. *Cell*. 2017;170(1):127-41.e15.
- 326 10. Chevrier S, Levine JH, Zanotelli VRT, Silina K, Schulz D, Bacac M, et al. An  
327 Immune Atlas of Clear Cell Renal Cell Carcinoma. *Cell*. 2017;169(4):736-49.e18.
- 328 11. Lavin Y, Kobayashi S, Leader A, Amir ED, Elefant N, Bigenwald C, et al. Innate  
329 Immune Landscape in Early Lung Adenocarcinoma by Paired Single-Cell Analyses. *Cell*.  
330 2017;169(4):750-65.e17.
- 331 12. Azizi E, Carr AJ, Plitas G, Cornish AE, Konopacki C, Prabhakaran S, et al.  
332 Single-Cell Map of Diverse Immune Phenotypes in the Breast Tumor Microenvironment.  
333 *Cell*. 2018;174(5):1293-308.e36.
- 334 13. Zhang MJ, Ntranos V, Tse D. One read per cell per gene is optimal for single-cell  
335 RNA-Seq. *bioRxiv*. 2018.
- 336 14. Nikolich-Zugich J. The twilight of immunity: emerging concepts in aging of the  
337 immune system. *Nature immunology*. 2018;19(1):10-9.
- 338 15. Hidalgo LG, Einecke G, Allanach K, Halloran PF. The transcriptome of human  
339 cytotoxic T cells: similarities and disparities among allostimulated CD4(+) CTL, CD8(+)  
340 CTL and NK cells. *American journal of transplantation : official journal of the American  
341 Society of Transplantation and the American Society of Transplant Surgeons*.  
342 2008;8(3):627-36.
- 343 16. Aran D, Hu Z, Butte AJ. xCell: digitally portraying the tissue cellular heterogeneity  
344 landscape. *Genome biology*. 2017;18(1):220.
- 345 17. Newman AM, Liu CL, Green MR, Gentles AJ, Feng W, Xu Y, et al. Robust  
346 enumeration of cell subsets from tissue expression profiles. *Nature methods*.  
347 2015;12(5):453-7.
- 348 18. Pang WW, Price EA, Sahoo D, Beerman I, Maloney WJ, Rossi DJ, et al. Human  
349 bone marrow hematopoietic stem cells are increased in frequency and myeloid-biased  
350 with age. *Proceedings of the National Academy of Sciences of the United States of  
351 America*. 2011;108(50):20012-7.
- 352 19. Nombela-Arrieta C, Manz MG. Quantification and three-dimensional  
353 microanatomical organization of the bone marrow. *Blood advances*. 2017;1(6):407-16.
- 354 20. Bendall SC, Simonds EF, Qiu P, Amir el AD, Krutzik PO, Finck R, et al. Single-  
355 cell mass cytometry of differential immune and drug responses across a human  
356 hematopoietic continuum. *Science (New York, NY)*. 2011;332(6030):687-96.

- 357 21. Levine JH, Simonds EF, Bendall SC, Davis KL, Amir el AD, Tadmor MD, et al.  
358 Data-Driven Phenotypic Dissection of AML Reveals Progenitor-like Cells that Correlate  
359 with Prognosis. *Cell*. 2015;162(1):184-97.
- 360 22. Wong MT, Ong DE, Lim FS, Teng KW, McGovern N, Narayanan S, et al. A High-  
361 Dimensional Atlas of Human T Cell Diversity Reveals Tissue-Specific Trafficking and  
362 Cytokine Signatures. *Immunity*. 2016;45(2):442-56.
- 363 23. Kimball AK, Oko LM, Bullock BL, Nemenoff RA, van Dyk LF, Clambey ET. A  
364 Beginner's Guide to Analyzing and Visualizing Mass Cytometry Data. *Journal of*  
365 *immunology* (Baltimore, Md : 1950). 2018;200(1):3-22.
- 366 24. Zappia L, Phipson B, Oshlack A. Exploring the single-cell RNA-seq analysis  
367 landscape with the scRNA-tools database. *PLoS computational biology*.  
368 2018;14(6):e1006245.
- 369 25. Becht E, Dutertre C-A, Kwok IWH, Ng LG, Ginhoux F, Newell EW. Evaluation of  
370 UMAP as an alternative to t-SNE for single-cell data. *bioRxiv*. 2018.
- 371 26. Stoeckius M, Hafemeister C, Stephenson W, Houck-Loomis B, Chattopadhyay  
372 PK, Swerdlow H, et al. Simultaneous epitope and transcriptome measurement in single  
373 cells. *Nature methods*. 2017;14(9):865-8.
- 374 27. Peterson VM, Zhang KX, Kumar N, Wong J, Li L, Wilson DC, et al. Multiplexed  
375 quantification of proteins and transcripts in single cells. *Nature biotechnology*.  
376 2017;35(10):936-9.
- 377 28. Shahi P, Kim SC, Haliburton JR, Gartner ZJ, Abate AR. Abseq: Ultrahigh-  
378 throughput single cell protein profiling with droplet microfluidic barcoding. *Scientific*  
379 *reports*. 2017;7:44447.
- 380 29. Cheung P, Vallania F, Warsinske HC, Donato M, Schaffert S, Chang SE, et al.  
381 Single-Cell Chromatin Modification Profiling Reveals Increased Epigenetic Variations  
382 with Aging. *Cell*. 2018;173(6):1385-97.e14.
- 383 30. Regev A, Teichmann SA, Lander ES, Amit I, Benoist C, Birney E, et al. The  
384 Human Cell Atlas. *eLife*. 2017;6.
- 385 31. Butler A, Hoffman P, Smibert P, Papalexi E, Satija R. Integrating single-cell  
386 transcriptomic data across different conditions, technologies, and species. *Nature*  
387 *biotechnology*. 2018;36(5):411-20.
- 388 32. Trapnell C, Cacchiarelli D, Grimsby J, Pokharel P, Li S, Morse M, et al. The  
389 dynamics and regulators of cell fate decisions are revealed by pseudotemporal ordering  
390 of single cells. *Nature biotechnology*. 2014;32(4):381-6.
- 391 33. Qiu X, Hill A, Packer J, Lin D, Ma YA, Trapnell C. Single-cell mRNA  
392 quantification and differential analysis with Census. *Nature methods*. 2017;14(3):309-15.

- 393 34. Qiu X, Mao Q, Tang Y, Wang L, Chawla R, Pliner HA, et al. Reversed graph  
394 embedding resolves complex single-cell trajectories. *Nature methods*. 2017;14(10):979-  
395 82.
- 396 35. McInnes L, Healy J. UMAP: Uniform Manifold Approximation and Projection for  
397 Dimension Reduction. arXiv:180203426. 2018.
- 398 36. Perfetto SP, Ambrozak D, Nguyen R, Chattopadhyay PK, Roederer M. Quality  
399 assurance for polychromatic flow cytometry using a suite of calibration beads. *Nature*  
400 *protocols*. 2012;7(12):2067-79.
- 401 37. Wang L, Hoffman RA. Standardization, Calibration, and Control in Flow  
402 Cytometry. *Current protocols in cytometry*. 2017;79:1.3.1-3.27.
- 403 38. Amir el AD, Davis KL, Tadmor MD, Simonds EF, Levine JH, Bendall SC, et al.  
404 viSNE enables visualization of high dimensional single-cell data and reveals phenotypic  
405 heterogeneity of leukemia. *Nature biotechnology*. 2013;31(6):545-52.
- 406 39. Bland JM, Altman DG. Statistical methods for assessing agreement between two  
407 methods of clinical measurement. *Lancet (London, England)*. 1986;1(8476):307-10.  
408

## 409 **Figures and Tables**

410

411 Figure 1. Single cell RNA sequencing of healthy bone marrow cells. (A) Cluster  
412 identification visualized using t-distributed stochastic neighbor embedding (t-SNE). (B)  
413 Single cell trajectory analysis using UMAP/Monocle 3. Color as in Figure 1A. (C)  
414 Examples of canonical gene expression used for annotation. (D) Reproducibility of  
415 technical replicates for single cell RNA sequencing. Linear regression line displayed in  
416 grey.

417

418 Figure 2. Comparison of single cell RNA sequencing and flow cytometry assessment of  
419 bone marrow cell type population frequencies. (A) Frequencies for major cell populations  
420 in human bone marrow shown for single cell RNA sequencing and flow cytometry. (B)  
421 Individual sample comparisons by scatter plot for each cell population. All population  
422 comparisons are shown in background in grey. Population frequencies are reported  
423 using denominator of all CD45 positive cells.

424

425 Figure 3. Comparison of single cell RNA sequencing, mass cytometry and flow  
426 cytometry assessment of T lymphocyte frequencies in human bone marrow. (A) Mass  
427 cytometry for phenotyping of T cell populations visualized using viSNE analysis with  
428 expression of key markers shown (B) Comparison of cell frequencies for each donor  
429 determined by mass cytometry and flow cytometry. (C) T cell frequencies for cell  
430 populations identified by mass cytometry, flow cytometry and single cell RNA  
431 sequencing. (D) Individual sample comparisons by scatter plot for each cell population.  
432 All population comparisons are shown in background in grey.

433

434 Table 1. Healthy volunteer sex and age at time of bone marrow aspiration. Biological  
435 replicate time points for a second longitudinal bone marrow aspirate from the same  
436 volunteers are shown within grey boxes. Assays from matched cryopreserved bone  
437 marrow mononuclear cell vials are indicated. Single cell RNA sequencing cell counts  
438 and sequencing depth (reads per cell and genes per cell) are listed for each donor and  
439 replicate.

440

441 Figures S1-S4 and Tables S1-S4 can be found in the supplementary information.



**Table 1**

| Sample | Gender | Age | Flow Cytometry | Mass Cytometry | Bulk RNA | scRNAseq | Technical Replicate | Cells | Reads/Cell | Genes/Cell |
|--------|--------|-----|----------------|----------------|----------|----------|---------------------|-------|------------|------------|
| T      | F      | 24  | x              | x              | x        | x        |                     | 4,293 | 88,461     | 1,000      |
| W      | F      | 28  | x              |                |          | x        |                     | 3,643 | 47,132     | 649        |
| E      | M      | 30  | x              |                |          | x        |                     | 3,939 | 69,061     | 575        |
| R      | M      | 31  | x              |                |          | x        |                     | 3,593 | 131,257    | 669        |
| F      | F      | 41  | x              |                |          | x        |                     | 3,746 | 75,712     | 846        |
| J      | F      | 43  | x              | x              | x        | x        |                     | 3,446 | 108,679    | 970        |
| U      | F      | 46  | x              | x              | x        | x        |                     | 4,118 | 85,295     | 1,143      |
| B      | M      | 47  | x              | x              | x        | x        |                     | 3,293 | 99,593     | 794        |
| H      | F      | 50  | x              | x              | x        | x        |                     | 5,013 | 63,164     | 883        |
| O      | M      | 50  | x              | x              | x        | x        |                     | 4,516 | 47,778     | 851        |
| Sk     | F      | 55  | x              |                |          | x        | Sk1                 | 1,138 | 323,589    | 823        |
|        |        |     |                |                |          | x        | Sk2                 | 4,726 | 163,732    | 820        |
| S      | F      | 56  | x              |                |          | x        | S1                  | 2,437 | 113,302    | 1,089      |
|        |        |     |                |                |          | x        | S2                  | 2,367 | 83,847     | 1,163      |
| L      | M      | 57  | x              |                |          | x        |                     | 4,548 | 67,199     | 950        |
| P      | F      | 58  | x              |                |          | x        |                     | 3,383 | 223,652    | 1,390      |
| G      | M      | 58  | x              |                |          | x        |                     | 4,283 | 89,208     | 667        |
| A      | F      | 59  | x              | x              | x        | x        |                     | 2,994 | 159,501    | 1,303      |
| Ck     | F      | 59  | x              |                |          | x        |                     | 1,052 | 349,511    | 761        |
|        |        |     |                |                |          | x        | C1                  | 3,556 | 62,645     | 692        |
| C      |        | 60  | x              | x              | x        | x        | C2                  | 3,136 | 58,675     | 692        |
| M      | M      | 60  | x              |                |          | x        |                     | 3,964 | 92,780     | 875        |
| Q      | M      | 66  | x              |                |          | x        |                     | 1,700 | 126,143    | 702        |
| N      | M      | 67  | x              |                |          | x        |                     | 4,522 | 110,195    | 881        |
| K      | M      | 84  | x              |                |          | x        |                     | 7,247 | 43,872     | 879        |

Sk and S are two samples taken from the same donor at different times (*ie: biological replicates*).

Ck and C two samples taken from the same donor at different times (*ie: biological replicates*).

Samples Sk, S and C were split and used for technical replicates of single cell RNA sequencing.

**A**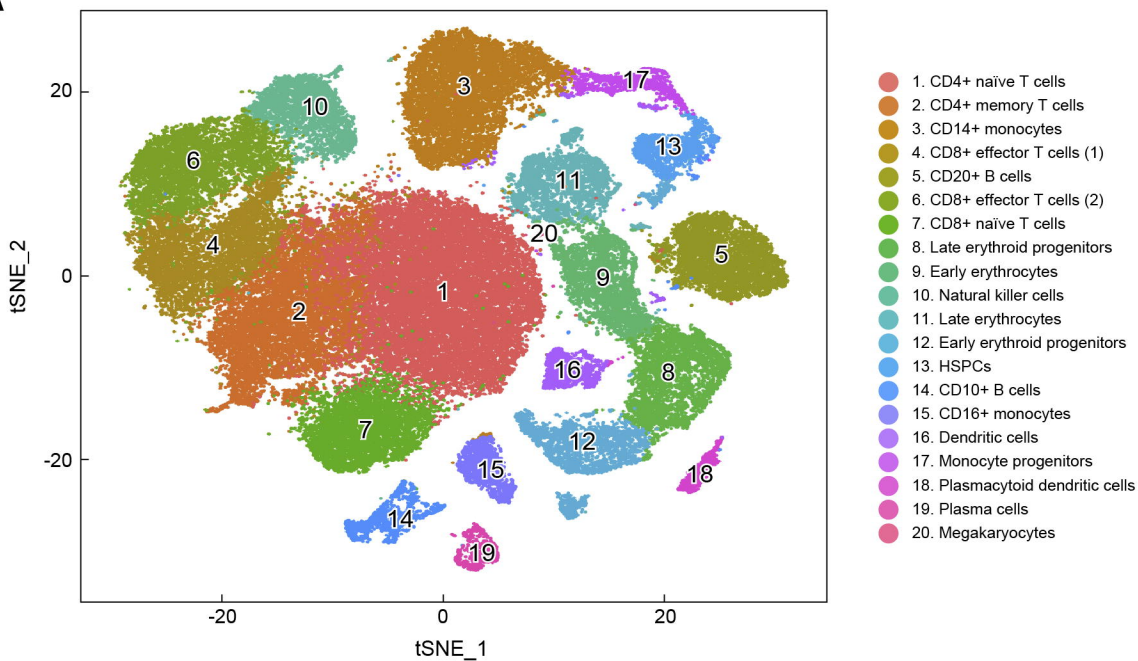**B**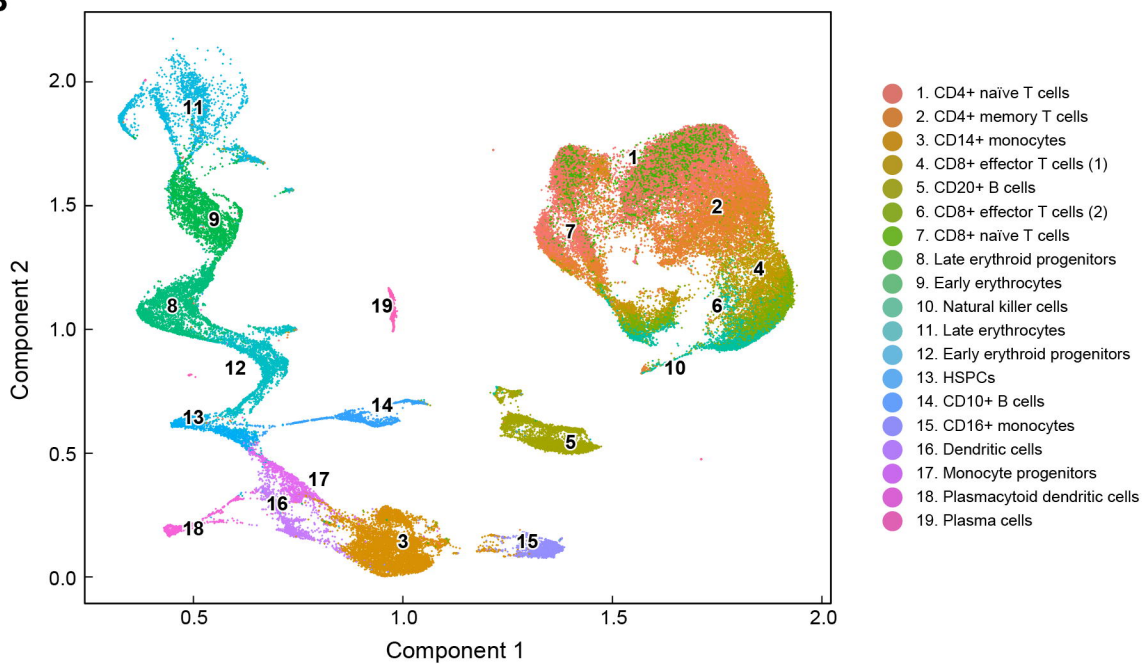**C**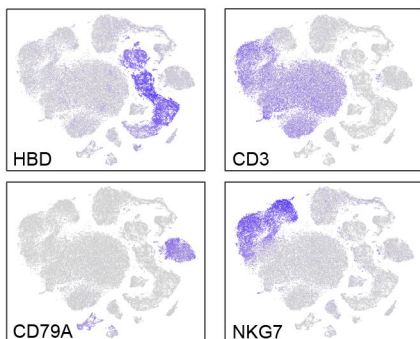**D**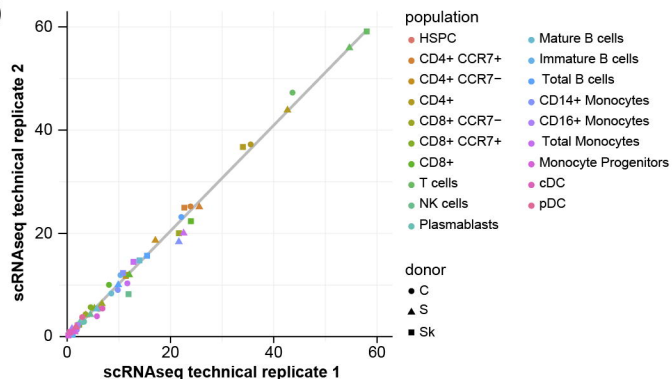

**A**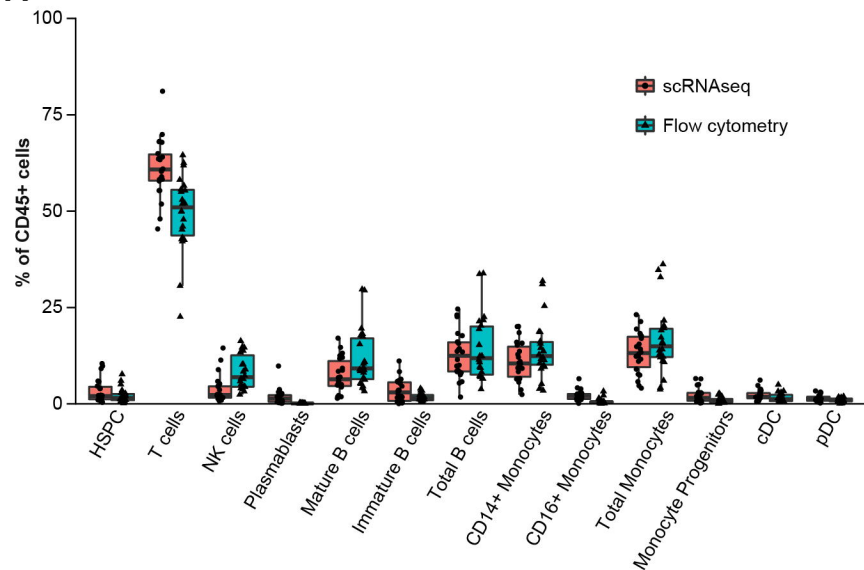**B**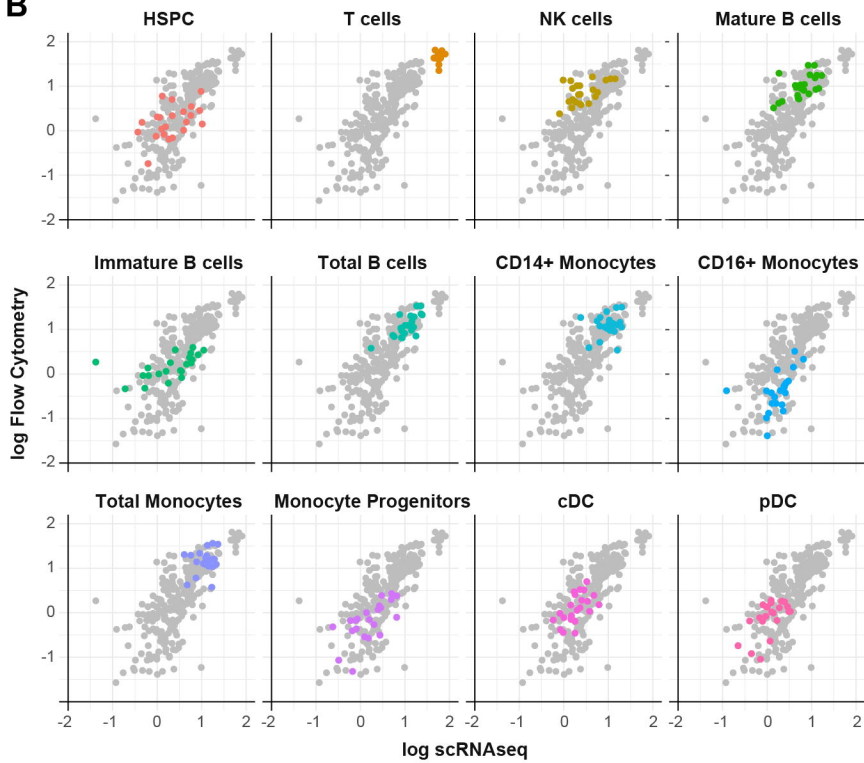

**A**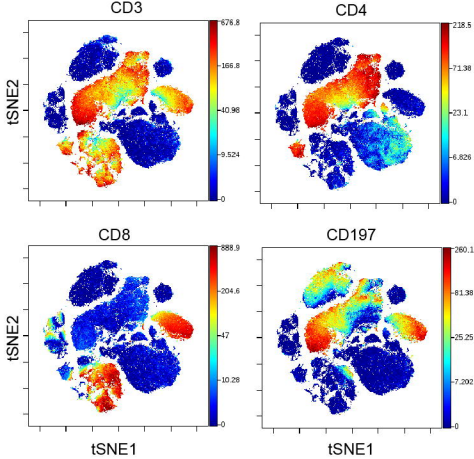**B**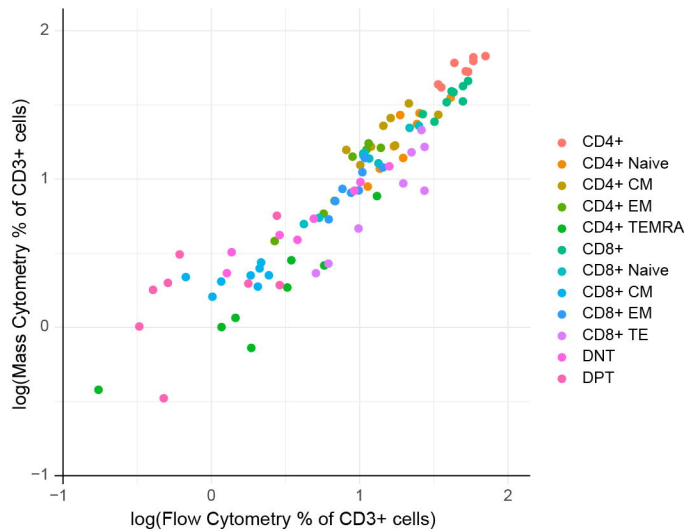**C**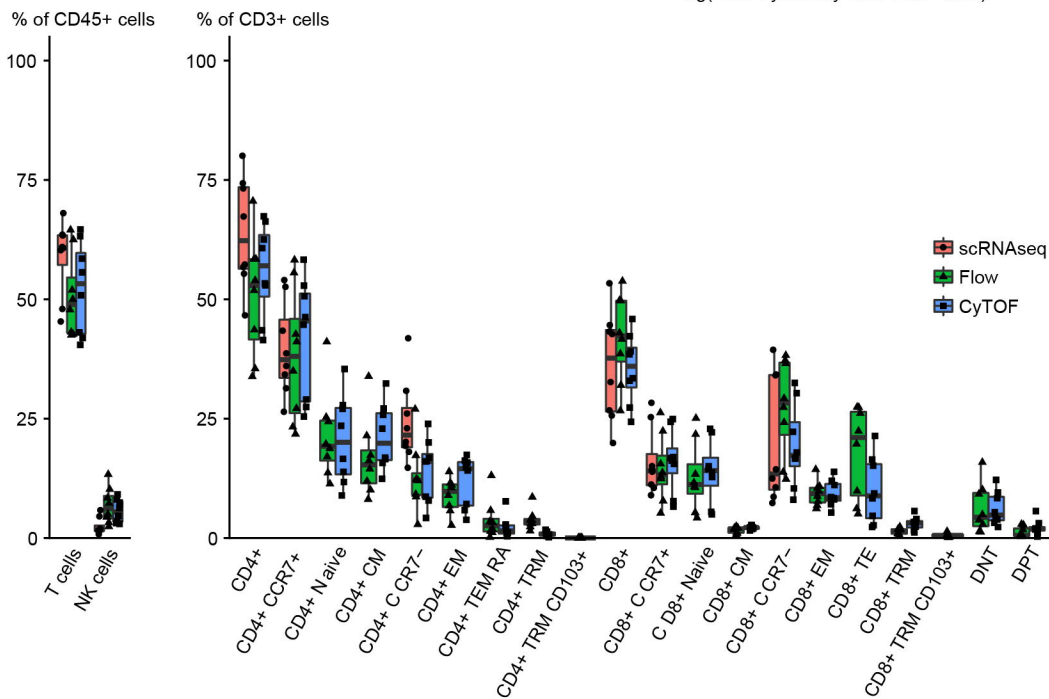**D**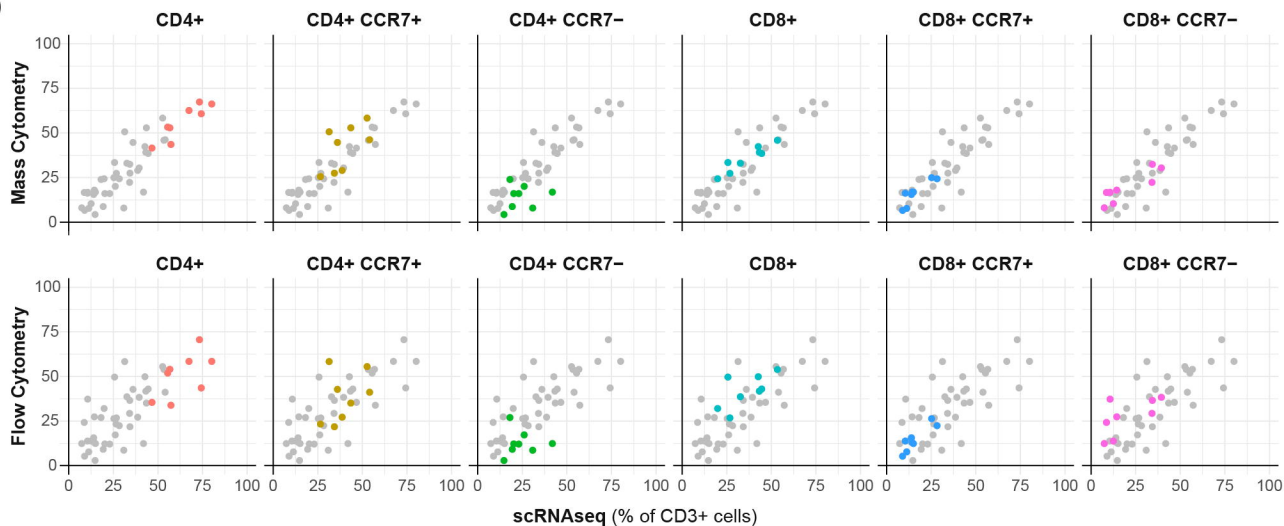

Source: https://www.biorxiv.org/content/10.1101/416750v1.full.pdf
